# Supplementary material for: Selective YAP activation in Procr cells is essential for ovarian stem/progenitor expansion and epithelium repair
Source: eLife. 2022 Mar 14;11:e75449. doi: 10.7554/eLife.75449 (PMC8920503; doi:10.7554/eLife.75449)
Supplement: Figure 1—figure supplement 2—source data 1. [file elife-75449-fig1-figsupp2-data1.xlsx]

## Sheet: Figure 1-figure supplement 2C
		Procr+ OSE				Procr- OSE
	Procr	0.0538976	0.0521504	0.0738795	0.0941186	0.0173216	0.0161307	0.0295307	0.0154762
	Birc5	0.0220215	0.0210969	0.0173216	0.0161307	0.0113802	0.0109	0.0136256	0.0146168

## Sheet: Figure 1-figure supplement 2D
		Ctrl			Yap-CKO
	Yap1	0.0146918	0.0154065	0.0138491	0.00540127	0.00570793	0.00465876
	Ccn1	0.185314	0.173074	0.191524	0.122388	0.118885	0.10547
