# Supplementary material for: Selective YAP activation in Procr cells is essential for ovarian stem/progenitor expansion and epithelium repair
Source: eLife. 2022 Mar 14;11:e75449. doi: 10.7554/eLife.75449 (PMC8920503; doi:10.7554/eLife.75449)
Supplement: Figure 1—source data 1. [file elife-75449-fig1-data1.xlsx]

## Sheet: Figure 1D
		YAP+ Nuclear Cells
		Rupture Site			Non-Rupture Site
		56.32	53.97	52.1	18	13.33	22.03

## Sheet: Figure 1G
	Nuclear YAP+ Cells
	Rupture Proximal	Rupture Proximal	Non-Rupture	Non-Rupture
	Procr+	Procr-	Procr+	Procr-
	74.36	41.67	26.09	19.44
	79.17	38.46	25	11.54
	74.07	38.64	25	16.67

## Sheet: Figure 1J
		Cryr61+ Cells
		Rupture Proximal	Rupture Proximal	Non-Rupture	Non-Rupture
		Procr+	Procr-	Procr+	Procr-
		45.45	11.11	0	28.57
		50	10	9.09	20
		66.77	6.25	10	25
		50	9.09	9.09	15.38
		40	0	10	26.67
		33.33	10	12.5	15
		42.86	15.38	10	15.79
		50	7.14	7.69	18.18
		60	0	0	20
		42.86	7.69	8.33	10.53
		0	6.25	12.5	11.11
		50	6.67	14.29	17.65
		50	16.67	12.5	16.67
		50	6.67	0	26.67
		33.33	6.25	14.29	18.75
		25	0	12.5	17.65
		33.33	0	11.11	25
		0	0	0	18.18
		50	0	12.5	19.05
		66.7	13.33	8.33	17.39
		40	10	0	15.79
		50	8.33	11.11	0
		0	13.33	13.33	8.33
		71.42	15.38	11.11	13.33
		57.14	15.38	10	25
		40	16.67	9.09	25
		40	14.29	12.5	20
		33.33	14.29	11.76	31.25
		50	7.14	10.53	0
		55.56	9.09	15	0
		50	10	16.67	17.39
		50	11.11	12.5	0
		40	13.33
		50	10
		66.67	7.69
		75	14.28
		50	7.69
