# Supplementary material for: Selective YAP activation in Procr cells is essential for ovarian stem/progenitor expansion and epithelium repair
Source: eLife. 2022 Mar 14;11:e75449. doi: 10.7554/eLife.75449 (PMC8920503; doi:10.7554/eLife.75449)
Supplement: Figure 2—source data 1. [file elife-75449-fig2-data1.xlsx]

## Sheet: Figure2E
Diameter of the wounds
	Ctrl
4.5d	303.696	194.768	203.056	306.508	189.144	237.984	313.76	204.092	231.472	229.4	235.024	262.404	379.472	280.164	356.828	271.136	339.66	346.32	492.1	189.44	308.284	185.296	229.696	220.964	251.896	271.284	273.208	344.544	256.04
6d	103.304	0	190.328	115.44	240.648	293.632	161.616	362.008	53.28	55.5	42.18	33.448	149.924	0	0	58.164	64.972	178.192	0	252.34	159.1	138.972	272.912
7.5d	0	0	0	0	0	0	0	28.712	76.072	0	0	0	0	100.936	105.08	0	0	0	0	0	0	0	0	97.532	116.032	0	0	0	0	0	0	0	0	0	113.22	112.036	0	0	0	158.36
	YAP-cKO
4.5d	428.164	356.68	270.84	337.736	257.224	253.08	221.408	227.624	216.08	292.004	261.516	207.496	297.036	140.304	248.344	188.7	321.752	298.072	266.844	216.524	135.124	196.988	536.944	286.676	210.456	211.048	270.248
6d	291.708	162.652	124.172	161.276	118.548	293.188	327.376	370.296	235.616	211.344	197.876	489.14	273.652	160.136	129.056	183.52	191.808	86.432	286.676	237.984	420.616	586.228	176.712	332.852	257.52	385.392	315.536	356.088	284.308	231.62	150.22
7.5d	214.008	254.856	130.536	70.892	347.948	51.06	453.62	268.472	160.728	317.016	103.896	316.128	90.724	64.528	0	239.316	88.356	113.96	43.216	77.552	210.604	182.04	168.912	115.144	85.544	98.716	113.072	0	0	0	188.7	291.412	0	0	269.36	179.968	253.968	136.308

## Sheet: Figure2H
	EdU+ Cells Number
	YAPfl/fl	Procr-CreER;YAPfl/fl
	7	1
	6	0
	6	2
	11	0
	9	0
	8	3
	5	2
	7	3
	3	2
	2	0
	8	2
	8	3
	7	1
	6	1
	2	1
	1	0
	4	1
	4	2
	3	4
	6	0
	5	4
	4	3
	5	1
	6	2
	5	1
	7	3
	5	2
	2	3
	3	5
	6	2
	8	2
	7	1
	6	0
	6	1
	4	2
	5	0
	7	0
	6	2
	8	4
	4	3
	3	0
	7	0
		2
		0
		1
		3
		1
		0
		2
		0
		1
		1
		1
		1
		1
		0
		2
		0
		0
		1

## Sheet: Figure2K
	Colony Size
	Ctrl	YAP CKO
	71.48	35.83
	40.25	26.16
	77.78	22.53
	84.64	26.54
	35.16	37.49
	36.89	29.29
	52.92	21.56
	36.54	25.81
	92.93	22.65
	56.18	19.37
	43.33	17.45
	33.88	27.79
	91.35	22.97
	55.65	30.39
	38.78	19.36
	43.32	21.85
	33.55	28.43
	37.19	22.13
	31.94	28.14
	47.61	27.93
	37.55	20.09
	39.16	31.12
	42.44	27.2
	40.91	39.37
	31.18	32.3
	32.07	65.52
	51.18	29.21
	78.65	37.42
	59.82	44.9
	77.86	37.82
	54.15	25.1
	33.35	35.36
	73.97	27.27
	46.35	23.66
	40.6	39.89
	48.4	27.14
	40.51	36.74
	60.92	32.9
	41.96	22.94
	40.39	29.21
	57.72	26.9
	42.38	25.37
		20.19
		22.19
		23.89
		23.18
		30.76
		34.96

## Sheet: Figure2O
	mG clone size
	Ctrl 4.5d	cKO 4.5d	Ctrl 7d	cKO 7d
	14	3	40	6
	30	4	6	4
	5	10	49	3
	3	5	58	7
	20	18	46	9
	5	2	44	4
	2	16	18	20
	26	9	4	4
	20	12	17	21
	14	13	42	23
	12	26	50	32
	15	3	69	3
	12	14	13	22
	25	3	21	4
	16	10	11	6
	20	12	80	14
	45	23	42	12
	7	1	57	14
	3	2	20	13
	4	2	19	12
	9	2	6	24
	8	2	21	12
	11	7	24	19
	23	15	6	6
	24	5	49	15
	19	5	56	9
	40	2	15	11
	9	11	20	10
	9	17	14	13
	38	8	8	15
	21	2	9	14
	12	18	10	9
	30	3	24	6
	15	1	41	5
	32	6	50	13
	27	3	64	16
	12		25	12
	13		73	18
	18		24	10
	23		8	30
			7
			30
			17
			73
			122
			13
			132
			22
			99
