# Supplementary material for: Selective YAP activation in Procr cells is essential for ovarian stem/progenitor expansion and epithelium repair
Source: eLife. 2022 Mar 14;11:e75449. doi: 10.7554/eLife.75449 (PMC8920503; doi:10.7554/eLife.75449)
Supplement: Figure 3—figure supplement 1—source data 1. [file elife-75449-fig3-figsupp1-data1.xlsx]

## Sheet: Figure 3B
		Procr+ OSE						Procr- OSE
	Procr	0.0745568	0.0738848	0.0786968	0.0520132	0.0464087	0.0535715	0.0117889	0.0100599	0.011656	0.015459	0.0162798	0.0181724
	Vgll4	0.0100555	0.00933581	0.0102734	0.00472207	0.00446579	0.00515542	0.0212046	0.0216574	0.0219612	0.0125698	0.0131921	0.0149407

## Sheet: Figure 3E
Vgll4+ Cells Percentage	Rupture						Non-Rupture
	Procr+ OSE cells			Procr- OSE cells			Procr+ OSE cells			Procr- OSE cells
	18.18	18	26.19	52.38	49.15	51.8	25	16.67	18.75	57.14	56.52	58.82

## Sheet: Figure 3L
Diameter of wounds
	Ctrl
4.5d	146.52	444.592	325.156	267.584	300.588	767.084	333.148	337.44	330.188	235.616	160.136	481.74	226.44	241.388	323.38	191.068	424.168	370.74	233.988	286.824	236.652	475.08	399.304
6d	118.844	215.488	43.66	107.004	211.196	534.428	242.572	155.548	108.484	97.532	42.328	296	145.632	403.892	55.352	101.232	658.6	0	0	45.436	90.132	230.88	61.124	293.04	223.48	458.8	198.468	71.928	34.928	0
7.5d	0	0	0	0	74.6808	0	0	70.596	0	0	0	0	84.212	0	0	0	96.94	0	0	88.356	0	0	0
	Vgll4-OE
4.5d			498.02	327.82	236.356	318.792	280.016	220.816	204.832	313.908	228.216	298.072	295.112	278.24	491.656	371.036	304.288	241.24	410.996	257.816	373.552	412.18	277.204	314.352
6d	428.608	463.832	449.92	536.944	253.672	677.84	752.432	843.896	274.392	214.6	256.336	672.512	134.384	402.56	404.632	131.72	336.848	408.628	356.384	540.792	280.312	556.095	79.92
7.5d	592.444	182.04	233.988	213.268	0	260.628	76.812	66.304	135.864	0	52.688	140.008	154.808	60.088	74.296	38.48	104.192	136.16	62.752	0	103.304

## Sheet: Figure 3O
		EdU+ Cell Number
		Teo-Vgll4	Procr-rtTA;Teo-Vgll4
		1	1
		2	1
		2	1
		1	0
		2	0
		3	0
		3	1
		3	2
		3	0
		2	0
		4	1
		2	0
		2	0
		3	1
		4	2
		5	1
		4	2
		7	2
		4	1
		4	1
		3	0
		3	3
		4	2
		1	3
		4	1
		5	1
		2	2
		3	1
		5	3
		4	0
		5	0
		6	0
		5	0
		6	1
		5	1
		3	1
		6	0
		5	3
		6	1
		3	0
		8	0
			3
			2
			0
			4
			2
			0
			0
			0

## Sheet: Figure 3Q
	Colony Size
	Vgll4	Procr-rtta;TetO-Vgll4
	64.56	18.19
	36.47	20.67
	33.31	19.49
	23.84	22.02
	55.62	27.1
	28.95	20.8
	31.89	17.18
	30.52	35.48
	22.22	24.19
	41.28	21.73
	31.74	25.75
	28.46	17.95
	40.01	20.33
	30.75	21.9
	68.27	17.51
	33.12	16.9
	30.24	20.24
	61.97	35
	63.18	19.17
	45.9	20.49
	43.34	19.17
	41.96	18.99
	30.97	19.08
	42.99	22.65
	35.85	15.84
	33	23.81
	37.09	19.13
	54.34	20.65
	35.62	18.49
	28.72	28.17
	39.86	12.62
	40.4	18.34
	22.15	17.99
	44.14	16.63
		12.6
		12.45
		17.15
		15.51
		19.49
		20.75
		15.75
		13.95
