# Supplementary material for: Selective YAP activation in Procr cells is essential for ovarian stem/progenitor expansion and epithelium repair
Source: eLife. 2022 Mar 14;11:e75449. doi: 10.7554/eLife.75449 (PMC8920503; doi:10.7554/eLife.75449)
Supplement: Figure 3—source data 1. [file elife-75449-fig3-data1.xlsx]

## Sheet: Figure 3-figure supplement 1e
		TetO-Vgll4			Procr-rtta;TetO-Vgll4
	Vgll4	0.0198127	0.0186873	0.0191008	0.795347	0.76995	0.787216
	Ccn1	0.114601	0.110318	0.120711	0.0587222	0.0598932	0.0616029
