# Supplementary material for: Selective YAP activation in Procr cells is essential for ovarian stem/progenitor expansion and epithelium repair
Source: eLife. 2022 Mar 14;11:e75449. doi: 10.7554/eLife.75449 (PMC8920503; doi:10.7554/eLife.75449)
Supplement: Figure 4—figure supplement 1—source data 1. [file elife-75449-fig4-figsupp1-data1.xlsx]

## Sheet: Figure 4-figure supplement 1
		Ctrl	Vgll4 OE
		22.88	0.75
		27.11	1.65
		27.27	3.61
		30.911	1.7
		34.43
