# Supplementary material for: Selective YAP activation in Procr cells is essential for ovarian stem/progenitor expansion and epithelium repair
Source: eLife. 2022 Mar 14;11:e75449. doi: 10.7554/eLife.75449 (PMC8920503; doi:10.7554/eLife.75449)
Supplement: Figure 4—figure supplement 2—source data 1. [file elife-75449-fig4-figsupp2-data1.xlsx]

## Sheet: Figure 4-figure supplement 2C
	Soft		Stiff
Procr	0.0183868	0.0180055	0.0331525	0.0334755

## Sheet: Figure 4-figure supplement 2E
		SC						shYAP
	Yap	0.0690898	0.0704525	0.0637487	0.0619809			0.0145847	0.0143105	0.0102332	0.00749899
	Procr	0.105773	0.106973	0.131826	0.131808			0.0652292	0.0637323	0.0373606	0.0359755

## Sheet: Figure 4-figure supplement 2F
		Ctrl			VP
	Cyr61	0.404466	0.389995	0.391968	0.12445	0.141585	0.12788
	Procr	0.0833069	0.0817576	0.0814487	0.00748605	0.00915519	0.00797543
