# Supplementary material for: Selective YAP activation in Procr cells is essential for ovarian stem/progenitor expansion and epithelium repair
Source: eLife. 2022 Mar 14;11:e75449. doi: 10.7554/eLife.75449 (PMC8920503; doi:10.7554/eLife.75449)
Supplement: Figure 4—source data 1. [file elife-75449-fig4-data1.xlsx]

## Sheet: Figure 4C
	Procr+ cells percentage
	Ctrl	Yap1-cKO
	20.2	7.12
	21.01	4.75
	20.37	7.18
	21.72	8.76
	20.21	8.68
	16.11	6.88
	16.52	9.03
	16.92
	17.01
	19.8
	21.15

## Sheet: Figure 4G
	H2B-GFP+ Cells Number
	Procr-rtTA;TetO-H2B-GFP+/-	Procr-rtTA;TetO-Vgll4;TetO-H2B-GFP+/-
	11	3
	5	4
	8	2
	8	3
	9	2
	12	1
	8	1
	5	2
	12	1
	11	2
	7	2
	11	2
	5	1
	9	3
	10	1
	10	2
	9	3
	5	2
	10	3
	9	0
	8	3
	4	2
	9	1
	10	2
	6	2
	7	5
	6	2
	4	1
	9	3
	9	0
	7	3
	7	3
	8	5
	4	2
	9	3
	9	7
	8	2
	4	1
	5	4
	7	2
	11	1
	10	1
	7	2
	8	1
	3	3
	8	2
	7	5
	9	8
	1	1
	6	3
	7	2
	3	3
	8	2
	6	3
	5	2
	9
	9
	9
	3
	2

## Sheet: Figure 4I
	Procr+ cells percentage
	Ctrl	Vgll4-OE
	19.2	10.01
	20	7.64
	15.6	7.84
	19	4.23

## Sheet: Figure 4K
	IP-IgG			IP-TEAD4
Ctgf	1	1.34548		4.07491		5.48272
Procr	1	1.09773	0.611123	17.7567	17.0117	17.9428
NC	1.43093	1		1.26214	1.34387

## Sheet: Figure 4L
		Luciferase activity
	Ctrl	16.8466	13.9668	14.8208
	YAP OE 20ng	58.7641	55.7907	68.4199
	YAP OE 100ng	106.022	120.343	129.148
	YAP OE 200ng	183.434	172.304	217.329
	YAP OE 400ng	283.672	343.504	283.084

## Sheet: Figure 4M
Mutation motif promoter	Luciferase activity
Ctrl	1.0315	0.7465	0.8072
YAP OE 10ng	0.7265	0.7134	0.6746
YAP OE 20ng	0.3459	0.514	0.3422
YAP OE 50ng	0.9459	0.9626	0.9557
