# Supplementary material for: Selective YAP activation in Procr cells is essential for ovarian stem/progenitor expansion and epithelium repair
Source: eLife. 2022 Mar 14;11:e75449. doi: 10.7554/eLife.75449 (PMC8920503; doi:10.7554/eLife.75449)
Supplement: Figure 5—source data 1. [file elife-75449-fig5-data1.xlsx]

## Sheet: Figure 5E
Diameter of the wounds
	Ctrl
4.5d	294.52	413.364	210.012	173.012	394.272	224.368	289.488	419.432	171.088	355.052	416.472	413.66	169.904	230.14	422.244	362.156	300.736	216.524	231.324	324.564	285.344	360.972	263.884
6d	193.288	204.98	143.56	61.864	0	0	0	0	0	0	0	55.5	129.648	183.52	58.46	67.192	79.92	87.172	124.172	74.444	80.216	89.688	0
7.5d	0	0	0	0	0	0	0	0	0	0	0	0	0	0	0	0	0	0	0	0	0	0	15.096	36.408
	Procr-cKO
4.5d				401.82	459.688	258.408	343.656	264.032	251.156	182.04	579.864	118.104	344.544	271.876	194.472	284.16	261.22	301.328	302.216	0	360.528	383.616	257.224	294.076	358.9	325.008
6d	271.876	77.256	101.232	422.244	169.756	274.392	302.512	244.792	334.924	313.76	300.144	130.388	166.5	193.436	119.288	250.86	159.1	240.5	186.924	178.784	225.552	216.524
7.5d						0	0	0	150.516	218.004	177.6	71.336	70.744	70.004	83.916	174.64	77.7	56.092	64.084	40.404	75.332	170.496	101.676	77.996	53.872	71.336	126.244	79.772

## Sheet: Figure 5H
	EdU+ Cells number
	Ctrl	cKO
	7	5
	5	4
	8	3
	2	3
	7	2
	1	2
	2	1
	7	1
	3	2
	3	2
	10	1
	9	0
	9	1
	9	0
	3	0
	2	3
	4	1
	3	2
	8	0
	4	1
	5	3
	5	3
	6	3
	8	1
	5	2
	3	2
	7	0
	5	1
	0	3
	2	0
	5	1
	3	4
	2	2
	3	2
	1	1
	5	0
	6	0
	4	1
	5	2
	3	0
		1
		2

## Sheet: Figure 5K
	Colony Size
	Ctrl	cKO
	48.22	26.02
	36.42	19.06
	35.84	18.25
	31.05	24.18
	34.58	16.45
	29.42	18.49
	36.41	19.04
	29.53	25.16
	37.05	21.62
	35.31	21.05
	25.82	21.31
	27.14	17.07
	29.92	22.62
	30.17	21.01
	25.32	21.41
	30.84	22.94
	29.79	23.39
	32.08	20.77
	28.81	23.88
	39.57	18.39
	29.25	16.37
	50.52	13.27
	31.04	21.33
	34.09	24.82
	36.73	16.59
	47.1	27.62
	26.26	36.94
	27.66	16.24
	19.99	19.57
	34.19	22.55
	47.46	20.39
	36.25	18.49
	22.59	23.07
	33.09	17.45
	26.13	19.17
	21.46	25.61
	33.3	31.71
	36.24	22.05
	29.6
